# Supplementary material for: Early Oxygen Treatment Measurements Can Predict COVID-19 Mortality: A Preliminary Study
Source: MDPI journal article supplement (doi:10.3390/healthcare10061146), 2022-06-20
Supplement: s1 [file s1]

## 1. Supplementary information

### Supplementary figure legends

**Figure S1. Death due to COVID-19 infection is dependent on the severity of the immune-inflammatory response and correlates with the OSS.** Laboratory blood test results for (A) Percentage of neutrophils (NEU%), (B) Absolute number of Lymphocytes (LYM abs.), (C), Level of urea in the blood (Urea-B), and (D) Level of LDH in the blood (LDH-B) of the survivor and non-survivor groups 14 days post-admission. (E) Heatmap showing the laboratory blood tests and their correlation with the OSS for the survivor and non-survivor groups.

### Supplementary tables

**Table S1.** Description of the features considered in the machine-learning model.

| Type            | Feature                           | Description                                                                                                                 |
|-----------------|-----------------------------------|-----------------------------------------------------------------------------------------------------------------------------|
| Medical history | Age                               | A numeric feature that indicates the age of the tested individual in years                                                  |
|                 | Existence of a background disease | A binary feature that indicates a pre-existing disease, such as anemia, COPD, dementia, or diabetes                         |
|                 | Gender                            | A binary feature that indicates the gender of the tested individual                                                         |
| OSS             | OSS (max, mean, increase)         | Three numeric features that indicate the maximum, average, and increase in the OSS value during hospitalization             |
| Blood tests     | LDH (min, max, mean, increase)    | Four numeric features that indicate the minimum, maximum, average, and increase in LDH in the blood during hospitalization  |
|                 | LYM% (min, max, mean, increase)   | Four numeric features that indicate the minimum, maximum, average, and increase in LYM% in the blood during hospitalization |
|                 | CRP (min, max, mean, increase)    | Four numeric features that indicate the minimum, maximum, average, and increase in CRP in the blood during hospitalization  |

Supplementary figures

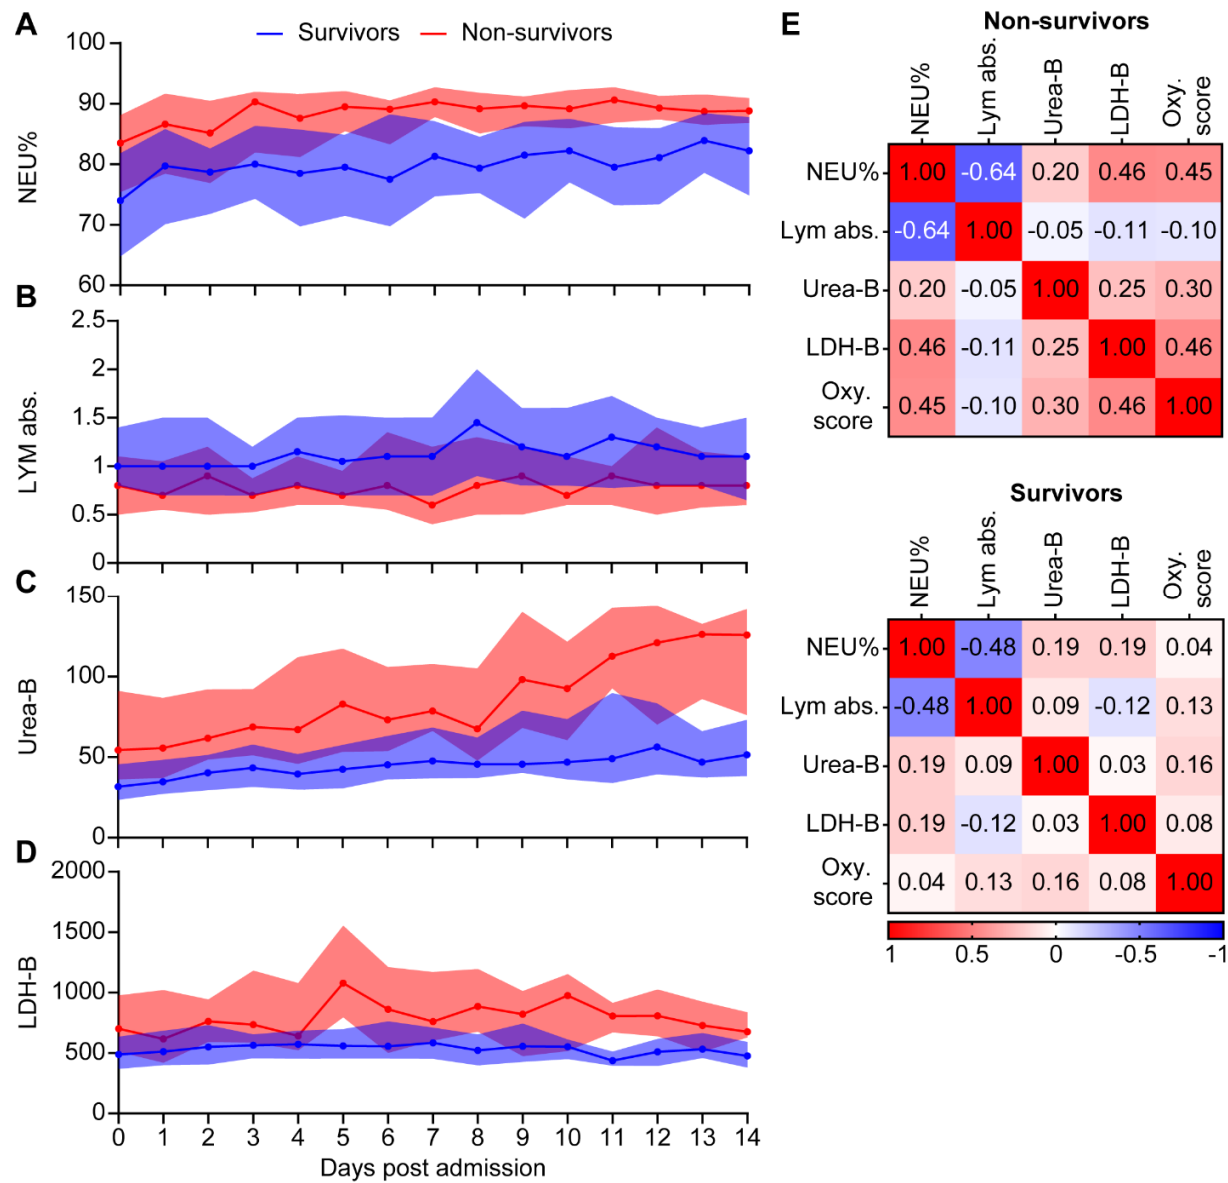

**Figure S1.** Death due to COVID-19 infection is dependent on the severity of the immune-inflammatory response and correlates with the OSS.
